# Supplementary material
Source: publisher figshare collection journal article supplement (https://future-science-group.figshare.com/ndownloader/files/34445180)
Supplement: Supplementary file 1 [file 34445180]

**Supplemental Information**

**Interview Guide**

Thank you for agreeing to participate in this interview. As we talked about before, this interview will focus on the pharmacogenomic test results that Dr. [Name] ordered and that Dr. [Name] discussed with you on your appointment on [Date]. As a reminder, these are the genetic test results that relate to how your child’s body uses medications.

**Understanding of Results**

I’m going to ask you some questions about the purpose and results of the testing. We are interested in what information stood out to you and what questions you still may have. There are no right or wrong answers, we just want to know your honest thoughts and what you took away from hearing about the results.

- Can you help me understand why this pharmacogenomic testing was done for your child?
- In your own words, what were the results of the testing?
  - Were there specific medications you remember the doctor talking about when discussing the results?
  - Do you recall how the results may impact those medications?
  - Were there specific genes you remember the doctor mentioning in the results?
- Which parts of the results did you feel that the doctor emphasized the most?
- What parts of the discussion of the results did you find easier or more difficult to understand?

**Perceived Utility and Implications of Results**

- What did the results help you to understand about your child in terms of future care?
  - Did the results provide the information you were expecting them to?
- What did you find useful about the results of the test? And what was not helpful?
- Have you discussed the results with the doctor who prescribes your child’s medications to help with behaviors and emotions?
  - Have the results led to any changes in your child’s medications? What changes?
- Are there any other ways you think you, your child, and their doctor may use the results now or in the future?
- Do you feel the results provided any information that may be useful for other family members?

**Additional Information Desired**

- Did you feel like you wanted any additional information after your conversation about the test results?
  - What type?
  - When and how do you think that additional information would best be provided?
  - Did you do any research or talk to anyone to get additional information?

**Support for Sharing Results**

- How do you plan to share these results with your child’s other healthcare providers?
- How do you think the doctor or clinic who discussed the results with you could help you to share them with other healthcare providers?
- Do you intend to share the results with any family members? Why or why not?
- How do you think the doctor or clinic who discussed the results with you could help you to share the results with family members?
- Will you want to make your child aware of these results as they get older, if they transition to manage their own healthcare?
- If so, how could the clinic or doctor make that easier?

**Background**

- Have you received a summary letter of the visit or test results?
  - If yes, have you looked or read through it?
- How long has your child been taking medications to help with his/her behaviors or emotions?
  - Has your child had difficulty with medications prescribed for their emotions or behavior, or was this testing done before starting this type of medication?
- Have you or your child had any other genetic testing before?

**Conclusion**

That is all the questions I have for you today. Is there anything else you wish I would have asked or that you’d like to share about this topic?
